# Supplementary material
Source: PubMed Central journal article supplement (PMC2716962)
Supplement: ajpath.2009.081081_2.pdf [file ajpath.2009.081081_2.pdf]

Suppl. Figure S2

A

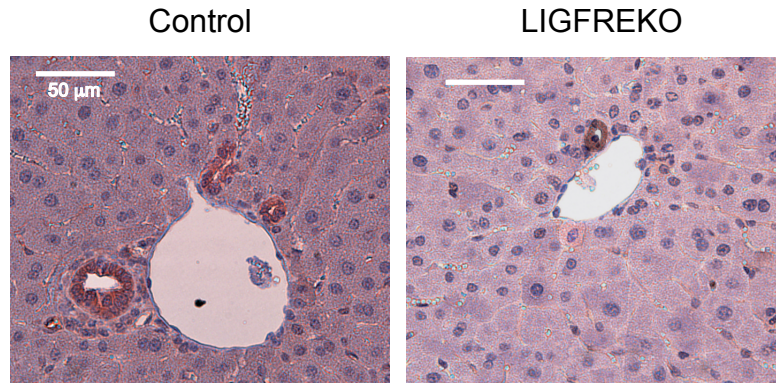

B

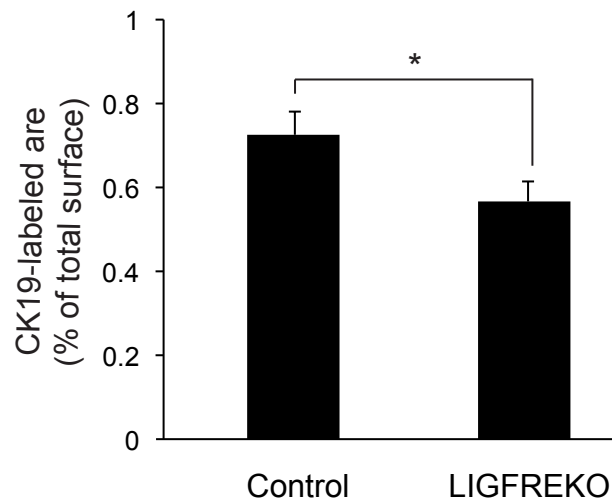

**Supplementary Figure S2. Bile duct mass in BDL mice.** Liver sections from bile duct-ligated control and LIGFREKO mice on post-operative day 3 were submitted to CK19 staining. (A) Representative immunohistochemistry for CK19 (arrows). (B) The CK19-labeled areas were measured using digital image analysis and expressed as a percentage of whole sections. Results are means  $\pm$  SEM. \*,  $P < 0.05$ .
